# Supplementary material
Source: publisher figshare collection journal article supplement (https://tandf.figshare.com/articles/dataset/_/4516751)
Supplement: Supplementary file 1 [file 1]

**Table S1.** Occurrences of published radiodontans around the world. Chronostratigraphic orders are adopted from various sources. Symbols: ‘?’: the radiodontan nature of these taxa is doubtful; ‘\*’: the controversial phylogenetic position of *Schinderhannes bartelsi* influences the monophyly of Radiodonta. Abbreviations: BF: body flap; CB: (nearly) complete body; DG: digestive gland; EY: eye; FA: frontal appendage; FM: fragment of body part; FU: furca; GT: gut; HS: head sclerite; IB: incomplete body; MS: musculature; NR: nerve; OC: oral cone; SB: setal structures; TF: tail fan.

| Deposits                                              | Fossil zones                                                        | Age     | Strata                               | Body parts                                    | Taxa/sclerites                                                                                                                                                                                                                                                                                                                                                                                                                                                                                                                                                                       | References                                                                                                                                                                           |
|-------------------------------------------------------|---------------------------------------------------------------------|---------|--------------------------------------|-----------------------------------------------|--------------------------------------------------------------------------------------------------------------------------------------------------------------------------------------------------------------------------------------------------------------------------------------------------------------------------------------------------------------------------------------------------------------------------------------------------------------------------------------------------------------------------------------------------------------------------------------|--------------------------------------------------------------------------------------------------------------------------------------------------------------------------------------|
| Zawiszyn Formation, Kaszuby, Pomerania, Poland        | <i>Fallotaspis</i> Zone                                             | Cam. S3 | Zawiszyn Fm.                         | FA                                            | <i>Peytoia infercambriensis</i> (Lendzion, 1975)                                                                                                                                                                                                                                                                                                                                                                                                                                                                                                                                     | Lendzion, 1975, 1977; Dzik & Lendzion, 1988; Daley & Legg, 2015.                                                                                                                     |
| Zunyi biota, Guizhou, South China                     | <i>Tsunyiidiscus niutitangensis</i> Zone                            | Cam. S3 | Niutitang Fm.                        | FA                                            | <i>Amplectobelua symbrachiata</i> Hou <i>et al.</i> , 1995                                                                                                                                                                                                                                                                                                                                                                                                                                                                                                                           | Shu <i>et al.</i> , 1992; Steiner <i>et al.</i> , 2005.                                                                                                                              |
| Chengjiang biota, Yunnan, South China                 | <i>Yunnanocephalus</i> Subzone, <i>Eoredlichia-Wutingaspis</i> Zone | Cam. S3 | Maotianshan Shale Mb., Yu'anshan Fm. | HS, FA, EY, OC, BF, S, TF, FU, CB, NR, GT, DG | <i>Amplectobelua symbrachiata</i> Hou <i>et al.</i> , 1995<br><i>Anomalocaris saron</i> Hou <i>et al.</i> , 1995<br><i>?Cucumericrus decoratus</i> Hou <i>et al.</i> , 1995<br><i>Lyrarapax unguispinus</i> Cong <i>et al.</i> , 2014<br><i>Lyrarapax trilobus</i> Cong <i>et al.</i> , 2016<br><i>?Parapeytoia yunnanensis</i> Hou <i>et al.</i> , 1995<br><i>Tauricornicaris latizonae</i> gen. et sp. nov.<br><i>Tauricornicaris oxygonae</i> gen. et sp. nov.<br><i>Zhenghecaris shankouensis</i> Vannier <i>et al.</i> , 2006<br>Chengjiang P-element<br>R-element<br>A-element | Chen <i>et al.</i> , 1994, 1996, 1997, 2004, 2007, 2012; Hou <i>et al.</i> , 1995, 2004; Vannier <i>et al.</i> , 2006; Cong <i>et al.</i> , 2014, 2016; <a href="#">This paper</a> . |
| Sirius Passet biota, Peary Land, Greenland            | <i>Nevadella</i> Zone                                               | Cam. S3 | Buen Fm.                             | FA                                            | <i>Tamisiocaris borealis</i> Daley & Peel, 2010                                                                                                                                                                                                                                                                                                                                                                                                                                                                                                                                      | Daley & Peel, 2010; Vinther <i>et al.</i> , 2014.                                                                                                                                    |
| Shuijingtuo Formation, Yichang, Hubei, South China    | <i>Hupeiidiscus orientalis</i> Zone                                 | Cam. S3 | Shuijingtuo Fm.                      | HS                                            | <i>?Huangshandongia yichangensis</i> Cui & Huo, 1990<br><i>?Liantuoia inflasa</i> Cui & Huo, 1990                                                                                                                                                                                                                                                                                                                                                                                                                                                                                    | Cui & Huo, 1990; Daley <i>et al.</i> , 2013a.                                                                                                                                        |
| Indian Springs biota, Esmeralda, Nevada, USA          | <i>Olenellus</i> Zone                                               | Cam. S3 | Middle Mb., Poleta Fm.               | FM                                            | Unnamed radiodontans                                                                                                                                                                                                                                                                                                                                                                                                                                                                                                                                                                 | English & Babcock, 2010.                                                                                                                                                             |
| Malong fauna, Yunnan, South China                     | <i>Drepanuroides</i> Zone                                           | Cam. S3 | Hongjingshao Fm.                     | FA                                            | <i>Anomalocaris saron</i> Hou <i>et al.</i> , 1995                                                                                                                                                                                                                                                                                                                                                                                                                                                                                                                                   | Zhang <i>et al.</i> , 2001; Luo <i>et al.</i> , 2008.                                                                                                                                |
| Eager Formation, Cranbrook, British Columbia, Canada  | <i>Bonnia-Olenellus</i> Zone                                        | Cam. S3 | Eager Fm.                            | FA                                            | <i>Anomalocaris canadensis</i> Whiteaves, 1892                                                                                                                                                                                                                                                                                                                                                                                                                                                                                                                                       | Resser, 1929; Briggs, 1979; Briggs & Mount, 1982.                                                                                                                                    |
| Kinzers Formation, Lancaster, Pennsylvania, USA       | <i>Bonnia-Olenellus</i> Zone                                        | Cam. S3 | Kinzers Fm.                          | FA                                            | <i>Anomalocaris pennsylvanica</i> Resser, 1929                                                                                                                                                                                                                                                                                                                                                                                                                                                                                                                                       | Resser, 1929; Resser & Howell, 1938; Briggs, 1979; Briggs & Mount, 1982.                                                                                                             |
| Latham Shale, San Bernardino, California, USA         | <i>Bristolia</i> Subzone, <i>Bonnia-Olenellus</i> Zone              | Cam. S3 | Latham Shale                         | FA                                            | <i>Anomalocaris canadensis</i> Whiteaves, 1892                                                                                                                                                                                                                                                                                                                                                                                                                                                                                                                                       | Briggs & Mount, 1982.                                                                                                                                                                |
| Pioche Formation, Lincoln, Nevada, USA                | <i>Olenellus</i> Zone to <i>Eokochaspis nodosa</i> Zones            | Cam. S4 | Comet Shale Mb., Pioche Fm.          | FA, OC, BF, FU, IB, GT                        | <i>Anomalocaris pennsylvanica</i> Resser, 1929<br><i>Anomalocaris</i> cf. <i>saron</i> Hou <i>et al.</i> , 1995<br>Unnamed radiodontans                                                                                                                                                                                                                                                                                                                                                                                                                                              | Lieberman, 2003.                                                                                                                                                                     |
| Guanshan biota, Yunnan, South China                   | <i>Palaeolenus</i> and <i>Megapalaeolenus</i> Zones                 | Cam. S4 | Wulongqing Fm.                       | FA                                            | <i>Anomalocaris kunmingensis</i> Wang <i>et al.</i> , 2013<br><i>Paranomalocaris multisegmentalis</i> Wang <i>et al.</i> , 2013<br><i>?Parapeytoia</i> sp. Hou <i>et al.</i> , 1995                                                                                                                                                                                                                                                                                                                                                                                                  | Luo <i>et al.</i> , 2008; Hu <i>et al.</i> , 2010, 2013; Wang <i>et al.</i> , 2013.                                                                                                  |
| Balang biota, Hunan, South China                      | <i>Arthricocephalus chauveau</i> Zone                               | Cam. S4 | Balang Fm.                           | FA                                            | <i>Anomalocaris</i> sp. Whiteaves, 1892<br><i>Peytoia</i> cf. <i>nathorsti</i> Walcott, 1911                                                                                                                                                                                                                                                                                                                                                                                                                                                                                         | Liu, 2013.                                                                                                                                                                           |
| Emu Bay Shale biota, Kangaroo Island, South Australia | <i>Pararaia janeae</i> Zone                                         | Cam. S4 | Emu Bay Shale                        | FA, EY, OC, BF, SB                            | <i>Anomalocaris briggsi</i> Nedin, 1995<br><i>Anomalocaris</i> cf. <i>canadensis</i> Whiteaves, 1892                                                                                                                                                                                                                                                                                                                                                                                                                                                                                 | McHenry & Yates, 1993; Nedin, 1995; Paterson <i>et al.</i> , 2011; Daley <i>et al.</i> , 2013b.                                                                                      |
| Mantou Formation, Tangshan, Hebei, North China        | <i>Luaspides huoshanensis</i> Zone                                  | Cam. S5 | Mantou Fm.                           | FA                                            | Unnamed radiodontans                                                                                                                                                                                                                                                                                                                                                                                                                                                                                                                                                                 | Huang <i>et al.</i> , 2012.                                                                                                                                                          |
| Kaili biota, Guizhou, South China                     | <i>Oryctocephalus indicus</i> Zone                                  | Cam. S5 | Kaili Fm.                            | FA                                            | <i>Anomalocaris saron</i> Hou <i>et al.</i> , 1995                                                                                                                                                                                                                                                                                                                                                                                                                                                                                                                                   | Zhao <i>et al.</i> , 2005, 2011.                                                                                                                                                     |
| Spence Shale, Wellsville Mountains, Utah, USA         | <i>Glossopleura</i> Zone                                            | Cam. S5 | Spence Shale Mb., Langston Fm.       | OC, SB, IB                                    | <i>Anomalocaris</i> sp. Whiteaves, 1892<br><i>Hurdia</i> sp. Walcott, 1912<br><i>Peytoia nathorsti</i> Walcott, 1911                                                                                                                                                                                                                                                                                                                                                                                                                                                                 | Conway Morris & Robison, 1982, 1988; Robison, 1991; Briggs <i>et al.</i> , 2008; Daley <i>et al.</i> , 2013a.                                                                        |

|                                               |                                                                                                                                                                    |                    |                                   |                                        |                                                                                                                                                                                                                                                                                                                                                  |                                                                                                                                                                                                                                   |
|-----------------------------------------------|--------------------------------------------------------------------------------------------------------------------------------------------------------------------|--------------------|-----------------------------------|----------------------------------------|--------------------------------------------------------------------------------------------------------------------------------------------------------------------------------------------------------------------------------------------------------------------------------------------------------------------------------------------------|-----------------------------------------------------------------------------------------------------------------------------------------------------------------------------------------------------------------------------------|
| Burgess Shale biota, British Columbia, Canada | latest <i>Glossopleura</i> Zone to early—middle <i>Bathyriscus</i> — <i>Elrathina</i> Zone                                                                         | Cam. S5            | Burgess Shale Fm. and Stephen Fm. | HS, FA, EY, OC, BF, SB, TF, CB, GT, MS | <i>Amplectobelua stephenensis</i> Daley & Budd, 2010<br><i>Anomalocaris canadensis</i> Whiteaves, 1892<br><i>Caryosyntrips serratus</i> Daley & Budd, 2010<br><i>Hurdia triangulata</i> Walcott, 1912<br><i>Hurdia victoria</i> Walcott, 1912<br><i>Peytoia nathorsti</i> Walcott, 1911<br><i>Stanleycaris hirpex</i> Caron <i>et al.</i> , 2010 | Conway Morris, 1978; Briggs, 1979; Whittington & Briggs, 1985; Collins <i>et al.</i> , 1996; Daley <i>et al.</i> , 2009, 2013a; Caron <i>et al.</i> , 2010; Daley & Budd, 2010; Daley & Bergström, 2012; Daley & Edgecombe, 2014. |
| Kuonamka Formation, Olenek, Yakutia, Siberia  | Unknown                                                                                                                                                            | Cam. S5 to Drumian | Kuonamak Fm.                      | SB, IB                                 | Unnamed radiodontans                                                                                                                                                                                                                                                                                                                             | Ponomarenko, 2010.                                                                                                                                                                                                                |
| Wheeler Formation, House Range, Utah, USA     | <i>Ptychagnostus atavus</i> Zone                                                                                                                                   | Cam. Drumian       | Wheeler Fm.                       | HS, FA, OC, BF, TF, CB, GT             | <i>Anomalocaris</i> sp. Whiteaves, 1892<br><i>Hurdia</i> sp. Walcott, 1912<br><i>Peytoia nathorsti</i> Walcott, 1911                                                                                                                                                                                                                             | Robison & Richards, 1981; Conway Morris & Robison, 1982, 1988; Robison, 1991; Briggs <i>et al.</i> , 2008; Daley <i>et al.</i> , 2013a.                                                                                           |
| Marjum Formation, House Range, Utah, USA      | <i>Ptychagnostus punctuosus</i> Zone                                                                                                                               | Cam. Drumian       | Marjum Fm.                        | BF, IB, GT, DG                         | <i>Peytoia nathorsti</i> Walcott, 1911                                                                                                                                                                                                                                                                                                           | Briggs & Robison, 1984; Conway Morris & Robison, 1988; Robison, 1991.                                                                                                                                                             |
| Jince Formation, Barrandian, Bohemia, Czech   | Uppermost part of interval between <i>Eccaparadoxides pusillus</i> and <i>Paradoxides gracilis</i> Zones; <i>Ellipsocephalus hoffi</i> - <i>Rejkocephalus</i> Zone | Cam. Drumian       | Jince Fm.                         | HS                                     | <i>Hurdia</i> sp. Walcott, 1912                                                                                                                                                                                                                                                                                                                  | Chlupáč & Kordule, 2002; Daley <i>et al.</i> , 2013a.                                                                                                                                                                             |
| Weeks Formation, House Range, Utah, USA       | <i>Proagnostus bulbus</i> Zone                                                                                                                                     | Cam. Guzhangian    | Weeks Fm.                         | FA                                     | <i>Anomalocaris</i> aff. <i>canadensis</i> Whiteaves, 1892<br><i>Anomalocaris</i> sp. Whiteaves, 1892                                                                                                                                                                                                                                            | Lerosey-Aubril <i>et al.</i> , 2014.                                                                                                                                                                                              |
| Klonówka Shale Formation, Wiśniówka, Poland   | <i>Protopeltura</i> Zone                                                                                                                                           | Cam. S10           | Klonówka Shale Fm.                | OC                                     | ' <i>Peytoia</i> '-type radiodontan                                                                                                                                                                                                                                                                                                              | Masiak & Żylińska, 1994.                                                                                                                                                                                                          |
| Fezouata biota, Zagora, Morocco               | <i>Araneograptus murrayi</i> Zone (graptolids)                                                                                                                     | Ord. Tremadocian   | Fezouata Fm.                      | HS, FA, OC, BF, SB, CB                 | Unnamed hurdiid radiodontans<br><i>Aegirocassis benmoulae</i> Van Roy <i>et al.</i> , 2015                                                                                                                                                                                                                                                       | Van Roy & Briggs, 2011; Daley <i>et al.</i> , 2013a; Van Roy <i>et al.</i> , 2015                                                                                                                                                 |
| Hunsrück Slate biota, Bundenbach, Germany     | <i>Polygnathus excavatus</i> Zone (conodont)                                                                                                                       | Dev. lower Emsian  | Kaub Fm.                          | FA, EY, OC, TF, FU, CB                 | * <i>Schinderhannes bartelsi</i> K i h l <i>et al.</i> , 2009                                                                                                                                                                                                                                                                                    | K i h l <i>et al.</i> , 2009.                                                                                                                                                                                                     |

## References

- Briggs, D.E.G. 1979. *Anomalocaris*, the largest known Cambrian arthropod. *Palaeontology*, 22(3): 631-664.
- Briggs, D.E.G. & Mount, J.D. 1982. The Occurrence of the Giant Arthropod *Anomalocaris* in the Lower Cambrian of Southern California, and the Overall Distribution of the Genus. *Journal of Paleontology*, 56(5): 1112-1118.
- Briggs, D.E.G. & Robison, R.A. 1984. Exceptionally preserved nontrilobite arthropods and *Anomalocaris* from the Middle Cambrian of Utah. *The University of Kansas Paleontological Contributions*, 111: 1-23.
- Briggs, D.E.G., Lieberman, B.S., Hendricks, J.R., Halgedahl, S.L. & Jarrard, R.D. 2008. Middle Cambrian Arthropods from Utah. *Journal of Paleontology*, 82(2): 238-254.
- Caron, J.-B., Gaines, R.R., Mángano, M.G., Streng, M. & Daley, A.C. 2010. A new Burgess Shale-type assemblage from the “thin” Stephen Formation of the southern Canadian Rockies. *Geology*, 38(9): 811-814.
- Chen, J.-Y. 2004. *The dawn of animal world*. Jiangsu Science and Technology Press, Nanjing, 367 pp.
- Chen, J.-Y. 2012. Evolutionary Scenario of the Early History of the Animal Kingdom: Evidence from Precambrian (Ediacaran) Weng'an and Early Cambrian Maotianshan Biotas, China. Pp. 239-379 in J. Talent (ed) *Earth and Life*. Springer Netherlands.
- Chen, J.-Y. & Zhou, G.-Q. 1997. Biology of the Chengjiang fauna. *Bulletin of the National Museum of Natural Science*, 10: 11-105.
- Chen, J.-Y., Ramsköld, L. & Zhou, G.-Q. 1994. Evidence for Monophyly and Arthropod Affinity of Cambrian Giant Predators. *Science*, 264(5163): 1304-1308.
- Chen, J.-Y., Waloszek, D., Maas, A., Braun, A., Huang, D.-Y., Wang, X.-Q. & Stein, M. 2007. Early Cambrian Yangtze Plate Maotianshan Shale macrofauna biodiversity and the evolution of predation. *Palaeogeography, Palaeoclimatology, Palaeoecology*, 254(1–2): 250-272.
- Chen, J.-Y., Zhou, G.-Q., Zhu, M.-Y. & Yeh, K.-Y. 1996. *The Chengjiang biota: a unique window of the Cambrian explosion*. National Museum of Natural Science, Taizhong, 222 pp.

- Chlupáč, I. & Kordule, V. 2002. Arthropods of Burgess Shale type from the Middle Cambrian of Bohemia (Czech Republic). *Bulletin of the Czech Geological Survey*, 77(3): 167-182.
- Collins, D. 1996. The "Evolution" of *Anomalocaris* and Its Classification in the Arthropod Class Dinocarida (nov.) and Order Radiodonta (nov.). *Journal of Paleontology*, 70(2): 280-293.
- Cong, P.-Y., Ma, X.-Y., Hou, X.-G., Edgecombe, G.D. & Strausfeld, N.J. 2014. Brain structure resolves the segmental affinity of anomalocaridid appendages. *Nature*, 513(7519): 538-542.
- Cong, P.-Y., Daley, A.C., Edgecombe, G.D., Hou, X.-G., & Chen, A.-L. 2016. Morphology of the radiodontan *Lyrarapax* from the early Cambrian Chengjiang biota. *Journal of Paleontology*, FirstView: 1-9. doi: 10.1017/jpa.2016.67.
- Conway Morris, S. 1978. *Laggania cambria* Walcott; a composite fossil. *Journal of Paleontology*, 52(1): 126-131.
- Conway Morris, S. & Robison, R.A. 1982. The Enigmatic Medusoid *Peytoia* and a Comparison of Some Cambrian Biotas. *Journal of Paleontology*, 56(1): 116-122.
- Conway Morris, S. & Robison, R.A. 1988. More soft-bodied animals and algae from the Middle Cambrian of Utah and British Columbia. *The University of Kansas Paleontological Contributions*, 122: 1-48.
- Cui, Z.-L. & Huo, S.-C. 1990. New discoveries of Lower Cambrian crustacean fossils from western Hubei. *Acta Palaeontologica Sinica*, 29(3): 321-330.
- Daley, A.C. & Bergström, J. 2012. The oral cone of *Anomalocaris* is not a classic "peytoia". *Naturwissenschaften*, 99(6): 501-504.
- Daley, A.C. & Budd, G.E. 2010. New anomalocaridid appendages from the Burgess Shale, Canada. *Palaeontology*, 53(4): 721-738.
- Daley, A.C. & Edgecombe, G.D. 2014. Morphology of *Anomalocaris canadensis* from the Burgess Shale. *Journal of Paleontology*, 88(1): 68-91.
- Daley, A.C. & Legg, D.A. 2015. A morphological and taxonomic appraisal of the oldest anomalocaridid from the Lower Cambrian of Poland. *Geological Magazine*, 152(5): 949-955.
- Daley, A.C. & Peel, J.S. 2010. A possible anomalocaridid from the Cambrian Sirius Passet lagerstätte, North Greenland. *Journal of Paleontology*, 84(2): 352-355.

- Daley, A.C., Budd, G.E. & Caron, J.-B. 2013a. Morphology and systematics of the anomalocaridid arthropod *Hurdia* from the Middle Cambrian of British Columbia and Utah. *Journal of Systematic Palaeontology*, 11(7): 743-787.
- Daley, A.C., Budd, G.E., Caron, J.-B., Edgecombe, G.D. & Collins, D. 2009. The Burgess Shale Anomalocaridid *Hurdia* and Its Significance for Early Euarthropod Evolution. *Science*, 323(5921): 1597-1600.
- Daley, A.C., Paterson, J.R., Edgecombe, G.D., García-Bellido, D.C. & Jago, J.B. 2013b. New anatomical information on *Anomalocaris* from the Cambrian Emu Bay Shale of South Australia and a reassessment of its inferred predatory habits. *Palaeontology*, 56(5): 971-990.
- Dzik, J. & Lendzion, K. 1988. The oldest arthropods of the East European Platform. *Lethaia*, 21(1): 29-38.
- English, A.M. & Babcock, L.E. 2010. Census of the Indian Springs Lagerstätte, Poleta Formation (Cambrian), western Nevada, USA. *Palaeogeography, Palaeoclimatology, Palaeoecology*, 295(1–2): 236-244.
- Hou, X.G., Bergström, J. & Ahlberg, P. 1995. *Anomalocaris* and other large animals in the lower Cambrian Chengjiang fauna of southwest China. *GFF*, 117(3): 163-183.
- Hou, X.-G., Aldridge, R.J., Bergström, J., Siveter, D.J., Siveter, D.J. & Feng, X.-H. 2004. *The Cambrian Fossils of Chengjiang, China: The Flowering of Early Animal Life*. Blackwell Science Ltd, 233 pp.
- Hu, S.-X., Zhu, M.-Y., Steiner, M., Luo, H.-L., Zhao, F.-C. & Liu, Q. 2010. Biodiversity and taphonomy of the Early Cambrian Guanshan biota, eastern Yunnan. *SCIENCE CHINA Earth Sciences*, 53(12): 1765-1773.
- Hu, S.-X., Zhu, M.-Y., Luo, H.-L., Steiner, M., Zhao, F.-C., Li, G.-X., Liu, Q. & Zhang, Z.-F. 2013. *The Guanshan Biota*. Yunnan Science Press, Kunming, 205 pp.
- Huang, D.-Y., Wang, Y.-Y., Gao, J. & Wang, Y.-N. 2012. A new anomalocaridid frontal appendage from the Middle Cambrian Mantou Formation of the Tangshan Area, Hebei. *Acta Palaeontologica Sinica*, 51(4): 411-415.
- Kühl, G., Briggs, D.E.G. & Rust, J. 2009. A Great-Appendage Arthropod with a Radial Mouth from the Lower Devonian Hunsrück Slate, Germany. *Science*, 323(5915): 771-773.

- Lendzion, K. 1975. Fauna of the *Mobergella* zone in the Polish Lower Cambrian. *Geological Quarterly*, 19(2): 237-242.
- Lendzion, K. 1977. *Cassubia*-a new generic name for Pomerania Lendzion, 1975. *Geological Quarterly*, 21(1): 211-212.
- Lerosey-Aubril, R., Hegna, T.A., Babcock, L.E., Bonino, E. & Kier, C. 2014. Arthropod appendages from the Weeks Formation Konservat-Lagerstätte: new occurrences of anomalocaridids in the Cambrian of Utah, USA. *Bulletin of Geosciences*, 89(2): 269-282.
- Lieberman, B.S. 2003. A New Soft-Bodied Fauna: The Pioche Formation of Nevada. *Journal of Paleontology*, 77(4): 674-690.
- Liu, Q. 2013. The first discovery of anomalocaridid appendages from the Balang Formation (Cambrian Series 2) in Hunan, China. *Alcheringa: An Australasian Journal of Palaeontology*, 37(3): 338-343.
- Luo, H.-L., Li, Y., Hu, S.-X., Fu, X.-P., Hou, S.-G., Liu, X.-Y., Chen, L.-Z., Li, F.-J., Pang, J.-Y. & Liu, Q. 2008. Early Cambrian Malong Fauna and Guanshan Fauna from Eastern Yunnan China. Yunnan Science and Technology Press, Kunming, 134 pp.
- Masiak, M. & Zylinska, A. 1994. Burgess Shale-type fossils in Cambrian sandstones of the Holy Cross Mountains. *Acta Palaeontologica Polonica*, 39(4): 329-340.
- McHenry, B. & Yates, A. 1993. First report of the enigmatic metazoan *Anomalocaris* from the southern hemisphere and a trilobite with preserved appendages from the Early Cambrian of Kangaroo Island, South Australia. *Records of the South Australian Museum*, 26(2): 77-86.
- Moore, R.A. & Lieberman, B.S. 2009. Preservation of early and Middle Cambrian soft-bodied arthropods from the Pioche Shale, Nevada, USA. *Palaeogeography, Palaeoclimatology, Palaeoecology*, 277(1–2): 57-62.
- Nedin, C. 1995. The Emu Bay Shale, a Lower Cambrian fossil Lagerstätte, Kangaroo Island, South Australia. *Memoirs of the Association of Australasian Palaeontologists*, 18: 31-40.
- Paterson, J.R., Garcia-Bellido, D.C., Lee, M.S.Y., Brock, G.A., Jago, J.B. & Edgecombe, G.D. 2011. Acute vision in the giant Cambrian predator *Anomalocaris* and the origin of compound eyes. *Nature*, 480(7376): 237-240.
- Ponomarenko, A.G. 2010. First record of Dinocarida from Russia. *Paleontological Journal*, 44(5): 503-504.

- Robison, R.A. 1991. Middle Cambrian biotic diversity examples from four Utah Lagerstätten. Pp. 77-98 in A.M. Simonetta and S. Conway Morris (eds) The early evolution of Metazoa and the significance of problematic taxa. Cambridge University Press.
- Robison, R.A. & Richards, B.C. 1981. Larger bivalve arthropods from the Middle Cambrian of Utah. The University of Kansas Paleontological Contributions, 106: 1-28.
- Resser, C.E. 1929. New Lower and Middle Cambrian Crustacea. Proceedings of the United States National Museum, 76(9): 1-25.
- Resser, C.E. & Howell, B.F. 1938. Lower Cambrian *Olenellus* Zone of the Appalachians. Bulletin of the Geological Society of America, 49: 195-248.
- Shu, D.-G., Chen, L., Zhang, X.-L., Xing, W., Wang, Z. & Ni, S. 1992. The lower Cambrian KIN Fauna of Chengjiang Fossil Lagerstätte from Yunnan, China. Journal of Northwest University, 22(supp): 31-38.
- Steiner, M., Zhu, M., Zhao, Y. & Erdtmann, B.-D. 2005. Lower Cambrian Burgess Shale-type fossil associations of South China. Palaeogeography, Palaeoclimatology, Palaeoecology, 220(1–2): 129-152.
- Van Roy, P. & Briggs, D.E.G. 2011. A giant Ordovician anomalocaridid. Nature, 473(7348): 510-513.
- Van Roy, P., Daley, A.C. & Briggs, D.E.G. 2015. Anomalocaridid trunk limb homology revealed by a giant filter-feeder with paired flaps. Nature, 522, 77-80.
- Vannier, J., Huang, D.-Y., Charbonnier, S., Wang, X.-Q. & Chen, J.-Y. 2006. The Early Cambrian origin of thylacocephalan arthropods. Acta Palaeontologica Polonica, 51: 201-214.
- Vinther, J., Stein, M., Longrich, N.R. & Harper, D.A.T. 2014. A suspension-feeding anomalocarid from the Early Cambrian. Nature, 507(7493): 496-499.
- Walcott, C.D. 1911. Cambrian geology and paleontology II. Middle Cambrian holothurians and medusae. Smithsonian Miscellaneous Collections, 57: 41-68.
- Walcott, C.D. 1912. Middle Cambrian Branchiopoda, Malacostraca, Trilobita and Merostomata. Smithsonian Miscellaneous Collections, 57: 145-228.
- Wang, Y.-Y., Huang, D.-Y. & Hu, S.-X. 2013. New anomalocaridid frontal appendages from the Guanshan biota, eastern Yunnan. Chinese Science Bulletin, 58(32): 3937-3942.

- Whiteaves, J.F. 1892. Description of a new genus and species of phyllocarid crustacea from the Middle Cambrian of Mount Stephen, BC. *The Canadian Record of Science*, V(4): 205-208.
- Whittington, H.B. & Briggs, D.E.G. 1985. The Largest Cambrian Animal, *Anomalocaris*, Burgess Shale, British Columbia. *Philosophical Transactions of the Royal Society of London. Series B, Biological Sciences*, 309(1141): 569-609.
- Zhang, X.-L., Shu, D.-G., Li, Y. & Han, J. 2001. New sites of Chengjiang fossils: crucial windows on the Cambrian explosion. *Journal of the Geological Society*, 158(2): 211-218.
- Zhao, Y.-L., Zhu, M.-Y., Babcock, L.E., Yuan, J.-L., Parsley, R.L., Peng, J., Yang, X.-L. & Wang, Y. 2005. Kaili Biota: A Taphonomic Window on Diversification of Metazoans from the Basal Middle Cambrian: Guizhou, China. *Acta Geologica Sinica - English Edition*, 79(6): 751-765.
- Zhao, Y.-L., Zhu, M.-Y., Babcock, L.E., Yuan, J.-L. & Peng, J. 2011. The Kaili Biota: marine organisms from 508 million years ago. Guizhou Science and Technology Press, Guiyang, 251 pp.
