# Supplementary material
Source: publisher figshare collection journal article supplement (https://tandf.figshare.com/articles/dataset/_/4516751)
Supplement: Supplementary file 2 [file 1]

**Table S2.** 27 Specimens with radiodontan head sclerites studied in this paper. Symbols: ‘?’: Unknown; ‘+’: Present; ‘-’: Absent. Numbers in the ‘TO’ column represent the numbers of cusps of the tooth elements. See Terminology for abbreviations.

| Figures              | NIGPAS     | Other numbers  | Taxa/sclerites          | Cuticle structures |    |    | Marginal structures |    |    | Other body parts |    |    |    |      |          | Types          | Preservation | Taphofacies | Localities |
|----------------------|------------|----------------|-------------------------|--------------------|----|----|---------------------|----|----|------------------|----|----|----|------|----------|----------------|--------------|-------------|------------|
|                      |            |                |                         | IL&OL              | TB | RS | MR                  | ML | MS | AC               | OC | RM | SB | TO   |          |                |              |             |            |
| 6A-I, 16B, C         | 162510a, b | -              | TL-element              | +                  | +  | -  | +                   | +  | +  | -                | -  | -  | -  | -    | Holotype | Isolated       | Event        | Mafang      |            |
| 13A-I, 16A           | 162511a, b | -              | TL-element              | +                  | +  | -  | +                   | +  | +  | -                | +  | +  | -  | 4    | Paratype | Disarticulated | Event        | Mafang      |            |
| 13J-O                | 162512     | -              | TL-element              | +                  | +  | -  | +                   | +  | +  | +                | -  | -  | +  | -    | Paratype | Disarticulated | Event        | Mafang      |            |
| 7G-J, 17C            | 162513a, b | -              | TL-element              | +                  | -  | +  | +                   | +  | +  | -                | -  | -  | -  | -    | -        | Isolated       | Background   | Baiyaolu    |            |
| 8A-G                 | 162514a, b | -              | TO-element              | +                  | ?  | +  | +                   | -  | +  | -                | -  | -  | -  | -    | Holotype | Isolated       | Background   | Maotianshan |            |
| 8H-M                 | 162515     | -              | TO-element              | +                  | ?  | +  | +                   | -  | +  | -                | -  | -  | -  | -    | Paratype | Isolated       | Background   | Mafang      |            |
| 9A-G, 16D-F          | 162516a, b | -              | TO-element              | +                  | +  | -  | -                   | +  | +  | -                | -  | -  | -  | -    | Paratype | Isolated       | Event        | Mafang      |            |
| 9H-M                 | 162517a, b | -              | TO-element              | +                  | +  | -  | -                   | +  | +  | +                | -  | -  | -  | -    | Paratype | Disarticulated | Background   | Mafang      |            |
| 6J-M, 17A            | 162518a, b | CJZ 0048, 0050 | TL-element              | +                  | +  | -  | +                   | +  | +  | -                | -  | -  | -  | -    | Paratype | Isolated       | Background   | Jianshan    |            |
| 14A-H, 15A-C, 16H, I | 162519a, b | -              | Z-element               | +                  | +  | +  | +                   | +  | +  | -                | -  | -  | -  | -    | -        | Isolated       | Event        | Mafang      |            |
| 14I-P, 16G           | 162520a, b | -              | Z-element               | +                  | +  | -  | +                   | +  | +  | -                | -  | -  | -  | -    | -        | Isolated       | Event        | Mafang      |            |
| 10A-F, 16L, 17D      | 162521a, b | -              | R-element               | +                  | +  | -  | +                   | +  | +  | -                | -  | -  | -  | -    | -        | Isolated       | Background   | Mafang      |            |
| 10G-J, 16J, K        | 162522     | -              | R-element               | +                  | +  | -  | +                   | +  | +  | -                | -  | -  | -  | -    | -        | Isolated       | Event        | Mafang      |            |
| 10K-N                | 162523a, b | -              | R-element               | +                  | +  | -  | +                   | +  | +  | -                | -  | -  | -  | -    | -        | Isolated       | Background   | Mafang      |            |
| 12                   | 162524a, b | -              | A-element               | +                  | -  | -  | -                   | -  | -  | +                | +  | -  | +  | 3, 5 | -        | Disarticulated | Background   | Mafang      |            |
| 11A-G, 17E, F        | 162525a, b | -              | P-element               | +                  | +  | -  | +                   | -  | +  | -                | -  | -  | -  | -    | -        | Isolated       | Background   | Shankou     |            |
| 7A-F, 17B            | 162526     | ELRC 19001     | TL-element              | +                  | +  | +  | +                   | +  | +  | -                | -  | -  | -  | -    | Paratype | Isolated       | Background   | Maotianshan |            |
| 18A-C                | 162527a, b | -              | <i>An. saron</i>        | +                  | -  | -  | +                   | -  | -  | -                | -  | -  | +  | -    | -        | Disarticulated | Event        | Mafang      |            |
| 11H-M                | 164469     | -              | P-element               | ?                  | +  | -  | -                   | -  | +  | -                | -  | -  | -  | -    | -        | Isolated       | Mixed        | Kuangshan   |            |
| 18D                  | ?          | ELRC 20001a    | <i>An. saron</i>        | +                  | -  | -  | +                   | -  | -  | -                | -  | -  | +  | -    | -        | Articulated    | Event        | Maotianshan |            |
| 18F                  | ?          | ELRC 21001     | <i>Am. symbrachiata</i> | +                  | -  | -  | +                   | -  | -  | -                | +  | -  | -  | ?    | -        | Disarticulated | Event        | Maotianshan |            |
| 18E                  | ?          | ELRC 21002b    | <i>Am. symbrachiata</i> | +                  | -  | -  | +                   | -  | -  | -                | -  | -  | -  | -    | -        | Articulated    | Event        | Maotianshan |            |
| 15F                  | ?          | SK 010120      | Z-element               | +                  | ?  | -  | +                   | -  | ?  | -                | -  | -  | -  | -    | Holotype | Isolated       | Event        | Shankou     |            |
| 15D, E               | ?          | SK 010121      | Z-element               | +                  | ?  | -  | +                   | -  | +  | -                | -  | -  | -  | -    | Paratype | Isolated       | Event        | Shankou     |            |
| -                    | ?          | CJZ 0049       | TL-element              | +                  | +  | -  | +                   | +  | +  | -                | -  | -  | -  | -    | -        | Isolated       | Background   | Jianshan    |            |
| -                    | ?          | -              | TO-element              | +                  | +  | -  | -                   | -  | +  | -                | -  | -  | -  | -    | -        | Isolated       | Background   | Mafang      |            |
| -                    | ?          | CPS 0353a, b   | TO-element              | +                  | ?  | +  | +                   | -  | +  | -                | -  | -  | -  | -    | -        | Isolated       | Background   | Ma'anshan   |            |
| -                    | ?          | CPS 3175a, b   | TO-element              | +                  | ?  | +  | +                   | -  | +  | -                | -  | -  | -  | -    | -        | Isolated       | Background   | Ma'anshan   |            |
| -                    | ?          | -              | TL-element              | +                  | +  | -  | +                   | +  | +  | -                | -  | +  | -  | -    | -        | Disarticulated | Background   | Mafang      |            |
